# Supplementary material for: Association Between Diabetes and 1-Year Adverse Clinical Outcomes in a Multinational Cohort of Ambulatory Patients With Chronic Heart Failure: Results From the ESC-HFA Heart Failure Long-Term Registry
Source: Oxford University Press journal article supplement (doi:10.2337/dc16-2016), 2017-03-02
Supplement: dc162016supplementarydata.pdf [file dc162016supplementarydata.pdf]

SUPPLEMENTARY DATA

Supplementary Table 1s. Baseline clinical characteristics as well as 1-year cumulative rates of clinical outcomes of the subgroups of CHF patients *with* diabetes stratified by the availability of HbA1c measurements at the study entry.

|                                                          | Patients with diabetes-<br><i>HbA1c available</i><br>(n=1,603) | Patients with diabetes-<br><i>HbA1c missing</i><br>(n=1,837) | P-value |
|----------------------------------------------------------|----------------------------------------------------------------|--------------------------------------------------------------|---------|
| Male, n (%)                                              | 76.6                                                           | 73.1                                                         | 0.019   |
| Age, years                                               | 66.7±11                                                        | 67.5±11                                                      | 0.007   |
| Ethnicity (Caucasian), %                                 | 95.0                                                           | 95.6                                                         | 0.409   |
| BMI, Kg/m <sup>2</sup>                                   | 29.5±5.4                                                       | 29.4±5.1                                                     | 0.626   |
| Systolic blood pressure, mmHg                            | 126.6±20.8                                                     | 126.4±21.9                                                   | 0.835   |
| Diastolic blood pressure, mmHg                           | 73.0±11.7                                                      | 74.2±12.6                                                    | 0.010   |
| Total cholesterol, mg/dL                                 | 164±93                                                         | 158±45                                                       | 0.048   |
| Diabetes medications, %                                  | 74.6                                                           | 69.2                                                         | <0.001  |
| Insulin                                                  | 46.3                                                           | 43.0                                                         |         |
| Oral hypoglycemic drugs only                             | 53.7                                                           | 57.0                                                         |         |
| Plasma glucose, mg/dL                                    | 144±57                                                         | 142±64                                                       | 0.968   |
| HbA <sub>1c</sub> , %                                    | 6.9 [6.4-7.9]                                                  | -                                                            | -       |
| HbA <sub>1c</sub> , mmol/mol                             | 51.9 [46.4-62.8]                                               | -                                                            | -       |
| Hypertension, %                                          | 71.1                                                           | 71.2                                                         | 0.980   |
| Current smokers, %                                       | 9.1                                                            | 9.4                                                          | 0.797   |
| Lipid-lowering medications, %                            | 72.5                                                           | 66.4                                                         | <0.001  |
| Cardiovascular medications, %                            |                                                                |                                                              |         |
| ACE-Inhibitors or ARBs                                   | 89.3                                                           | 86.1                                                         | 0.006   |
| Beta-blockers                                            | 86.8                                                           | 85.3                                                         | 0.230   |
| Aldosterone-antagonists                                  | 52.5                                                           | 55.6                                                         | 0.073   |
| Diuretics                                                | 85.9                                                           | 88.0                                                         | 0.077   |
| Digitalis                                                | 21.9                                                           | 25.9                                                         | 0.008   |
| Calcium channel blockers                                 | 14.2                                                           | 14.6                                                         | 0.723   |
| Anti-platelets or anticoagulants                         | 86.4                                                           | 85.3                                                         | 0.380   |
| Nitrates                                                 | 23.2                                                           | 23.9                                                         | 0.648   |
| Amiodarone                                               | 13.4                                                           | 14.8                                                         | 0.236   |
| e-GFR <sub>MDRD</sub> <60 mL/min/1.73 m <sup>2</sup> , % | 52.1                                                           | 52.7                                                         | 0.724   |
| NT-proBNP, pg/dL                                         | 1,170 [490-2,987]                                              | 1,593 [663-4,160]                                            | 0.131   |
| LVEF, %                                                  | 37.3±13                                                        | 36.9±13                                                      | 0.317   |
| LVEF >45%, %                                             | 23.7                                                           | 21.7                                                         | 0.190   |
| HF etiology, %                                           |                                                                |                                                              | 0.894   |
| Ischemic                                                 | 24.3                                                           | 23.4                                                         |         |
| Hypertensive                                             | 8.2                                                            | 8.7                                                          |         |
| Dilated                                                  | 53.5                                                           | 53.4                                                         |         |
| Other                                                    | 14.1                                                           | 14.4                                                         |         |
| Chronic Obstructive Pulmonary Diseases, %                | 17.3                                                           | 16.0                                                         | 0.297   |
| Previous stroke, %                                       | 10.1                                                           | 11.3                                                         | 0.251   |
| 1-year all-cause death, %                                | 8.5                                                            | 10.2                                                         | 0.080   |
| 1-year CVD death, %                                      | 4.6                                                            | 5.1                                                          | 0.487   |
| 1-year HF hospitalization, %                             | 13.2                                                           | 14.3                                                         | 0.355   |

Data presented as either means±SD or medians and interquartile ranges (in parenthesis) or percentages.

Abbreviations: CHF, chronic heart failure; BMI, body mass index; ACE, Angiotensin Converting Enzyme; ARBs, Angiotensin Receptor Blockers; LVEF, left ventricular ejection fraction; NYHA, New York Heart Association; e-GFR<sub>MDRD</sub>, glomerular filtration rate estimated according to the Modification of Diet in Renal Disease (MDRD) study equation; NT-proBNP, N-terminal of the prohormone brain natriuretic peptide.

SUPPLEMENTARY DATA

Supplementary Table 2. Baseline clinical characteristics as well as 1-year cumulative rates of clinical outcomes of the subgroups of CHF patients *without* diabetes stratified by the availability of HbA1c measurements available at the study entry.

|                                                          | Patients without diabetes-<br>HbA1c available<br>(n=964) | Patients without diabetes-<br>HbA1c missing<br>(n=5,024) | P-value |
|----------------------------------------------------------|----------------------------------------------------------|----------------------------------------------------------|---------|
| Male, n (%)                                              | 70.9                                                     | 69.5                                                     | 0.392   |
| Age, years                                               | 61.4±14                                                  | 64.2±15                                                  | <0.001  |
| Ethnicity (Caucasian), %                                 | 92.2                                                     | 94.7                                                     | 0.003   |
| BMI, Kg/m <sup>2</sup>                                   | 27.6±5.1                                                 | 27.2±4.8                                                 | 0.029   |
| Systolic blood pressure, mmHg                            | 121.7±20.1                                               | 123.5±20.7                                               | 0.004   |
| Diastolic blood pressure, mmHg                           | 73.9±11.7                                                | 73.9±12.3                                                | 0.646   |
| Total cholesterol, mg/dL                                 | 179±44                                                   | 171±44                                                   | 0.048   |
| Plasma glucose, mg/dL                                    | 95±13                                                    | 94±13                                                    | 0.172   |
| HbA <sub>1c</sub> , %                                    | 5.7 [5.4-6.0]                                            | -                                                        | -       |
| HbA <sub>1c</sub> , mmol/mol                             | 38.8 [35.5-42.1]                                         | -                                                        | -       |
| Hypertension, %                                          | 48.2                                                     | 52.4                                                     | 0.019   |
| Current smokers, %                                       | 16.7                                                     | 11.7                                                     | <0.001  |
| Lipid-lowering medications, %                            | 52.0                                                     | 49.9                                                     | 0.239   |
| Cardiovascular medications, %                            |                                                          |                                                          |         |
| ACE-Inhibitors or ARBs                                   | 86.8                                                     | 85.4                                                     | 0.279   |
| Beta-blockers                                            | 86.5                                                     | 85.5                                                     | 0.468   |
| Aldosterone-antagonists                                  | 58.5                                                     | 53.1                                                     | 0.003   |
| Diuretics                                                | 71.3                                                     | 78.8                                                     | <0.001  |
| Digitalis                                                | 16.5                                                     | 21.1                                                     | 0.001   |
| Calcium channel blockers                                 | 10.5                                                     | 9.8                                                      | 0.523   |
| Anti-platelets or anticoagulants                         | 73.5                                                     | 75.0                                                     | 0.318   |
| Nitrates                                                 | 17.0                                                     | 15.2                                                     | 0.154   |
| Amiodarone                                               | 10.8                                                     | 14.4                                                     | 0.004   |
| e-GFR <sub>MDRD</sub> <60 mL/min/1.73 m <sup>2</sup> , % | 36.6                                                     | 40.1                                                     | 0.047   |
| NT-proBNP, pg/dL                                         | 968 [333-2,547]                                          | 1,380 [540-3,619]                                        | <0.001  |
| LVEF, %                                                  | 38.3±13                                                  | 37.8±14                                                  | 0.154   |
| LVEF >45%, %                                             | 25.1                                                     | 24.6                                                     | 0.759   |
| HF etiology, %                                           |                                                          |                                                          | 0.401   |
| Ischemic                                                 | 34.4                                                     | 31.9                                                     |         |
| Hypertensive                                             | 7.5                                                      | 8.2                                                      |         |
| Dilated                                                  | 36.6                                                     | 36.9                                                     |         |
| Other                                                    | 21.5                                                     | 23.0                                                     |         |
| Chronic Obstructive Pulmonary Diseases, %                | 13.3                                                     | 12.5                                                     | 0.472   |
| Previous stroke, %                                       | 8.2                                                      | 8.6                                                      | 0.675   |
| 1-year all-cause death, %                                | 7.1                                                      | 7.3                                                      | 0.817   |
| 1-year CVD death, %                                      | 3.7                                                      | 3.8                                                      | 0.897   |
| 1-year HF hospitalization, %                             | 7.2                                                      | 9.7                                                      | 0.055   |

Data presented as either means±SD or medians and interquartile ranges (in parenthesis) or percentages.

Abbreviations: CHF, chronic heart failure; BMI, body mass index; ACE, Angiotensin Converting Enzyme; ARBs, Angiotensin Receptor Blockers; LVEF, left ventricular ejection fraction; NYHA, New York Heart Association; e-GFR<sub>MDRD</sub>, glomerular filtration rate estimated according to the Modification of Diet in Renal Disease (MDRD) study equation; NT-proBNP, N-terminal of the prohormone brain natriuretic peptide.

SUPPLEMENTARY DATA

**Supplementary Table 3<sub>s</sub>. Association between reduced vs. preserved left ventricular ejection fraction (LVEF) at the study entry and risk of 1-year clinical outcomes in the whole cohort of patients with CHF stratified by diabetes status.**

| Group(s)                         | Outcome(s)                  | LVEF cut-offs (%) | Events/patients | Rate per 100 patient-years (95% CI) | Unadjusted HR (95% CI) | Adjusted HR* (95% CI) |
|----------------------------------|-----------------------------|-------------------|-----------------|-------------------------------------|------------------------|-----------------------|
| <b>Patients with diabetes</b>    | <b>All-causes death</b>     | <45%              | 219/2127        | 10.3 (9.0-11.7)                     | 1.32 (1.01-1.73)       | 1.15 (0.95-1.70)      |
|                                  |                             | ≥45%              | 68/842          | 8.1 (6.3-10.1)                      | Ref.                   | Ref.                  |
|                                  | <b>Cardiovascular death</b> | <45%              | 120/2127        | 5.6 (4.7-6.7)                       | 1.96 (1.27-3.02)       | 1.59 (1.00-2.51)      |
|                                  |                             | ≥45%              | 25/842          | 3.0 (1.9-4.4)                       | Ref.                   | Ref.                  |
|                                  | <b>HF hospitalization</b>   | <45%              | 332/2127        | 15.6 (14.1-17.2)                    | 1.46 (1.15-1.84)       | 1.52 (1.19-1.94)      |
|                                  |                             | ≥45%              | 92/842          | 10.9 (8.9-13.2)                     | Ref.                   | Ref.                  |
| <b>Patients without diabetes</b> | <b>All-causes death</b>     | <45%              | 269/3541        | 7.6 (6.7-8.5)                       | 1.26 (1.00-1.60)       | 1.33 (1.03-1.73)      |
|                                  |                             | ≥45%              | 94/1558         | 6.0 (4.9-7.3)                       | Ref.                   | Ref.                  |
|                                  | <b>Cardiovascular death</b> | <45%              | 145/3541        | 4.1 (3.5-4.8)                       | 1.16 (0.85-1.58)       | 1.25 (0.88-1.77)      |
|                                  |                             | ≥45%              | 55/1558         | 3.5 (2.7-4.6)                       | Ref.                   | Ref.                  |
|                                  | <b>HF hospitalization</b>   | <45%              | 374/3541        | 10.6 (9.6-11.6)                     | 1.62 (1.30-2.02)       | 1.45 (1.14-1.85)      |
|                                  |                             | ≥45%              | 101/1558        | 6.5 (5.3-7.8)                       | Ref.                   | Ref.                  |

CI=confidence interval, HR=hazard ratio.

\*Covariates for adjustment: age, sex, systolic blood pressure, eGFR<sub>MDRD</sub>, HF etiology and hemoglobin values.

SUPPLEMENTARY DATA

**Supplementary Table 4s. Association between HF etiology at the study entry and risk of 1-year clinical outcomes in the whole cohort of patients with CHF stratified by diabetes status.**

| Group(s)                         | Outcome(s)                  | HF etiology  | Events/patients | Rate per 100 patient-years (95% CI) | Unadjusted HR (95% CI) | Adjusted HR* (95% CI) |
|----------------------------------|-----------------------------|--------------|-----------------|-------------------------------------|------------------------|-----------------------|
| <b>Patients with diabetes</b>    | <b>All-causes death</b>     | Ischemic     | 197/1833        | 10.7 (9.4-12.3)                     | 1.40 (1.12-1.75)       | 1.19 (0.92-1.54)      |
|                                  |                             | Non-ischemic | 125/1597        | 7.8 (6.6-9.3)                       | Ref.                   | Ref.                  |
|                                  | <b>Cardiovascular death</b> | Ischemic     | 99/1833         | 5.4 (4.4-6.5)                       | 1.34 (0.98-1.83)       | 1.06 (0.74-1.51)      |
|                                  |                             | Non-ischemic | 66/1597         | 4.1 (3.2-5.2)                       | Ref.                   | Ref.                  |
|                                  | <b>HF hospitalization</b>   | Ischemic     | 254/1833        | 13.9 (12.3-15.5)                    | 1.00 (0.83-1.20)       | 0.90 (0.73-1.10)      |
|                                  |                             | Non-ischemic | 221/1597        | 13.8 (12.2-15.6)                    | Ref.                   | Ref.                  |
| <b>Patients without diabetes</b> | <b>All-causes death</b>     | Ischemic     | 195/2188        | 8.9 (7.8-10.2)                      | 1.47 (1.22-1.78)       | 1.11 (0.88-1.40)      |
|                                  |                             | Non-ischemic | 233/3754        | 6.2 (5.5-7.0)                       | Ref.                   | Ref.                  |
|                                  | <b>Cardiovascular death</b> | Ischemic     | 108/2188        | 4.9 (4.1-5.9)                       | 1.62 (1.25-2.10)       | 1.29 (0.96-1.73)      |
|                                  |                             | Non-ischemic | 117/3754        | 3.1 (2.6-3.7)                       | Ref.                   | Ref.                  |
|                                  | <b>HF hospitalization</b>   | Ischemic     | 219/2188        | 10.0 (8.8-11.3)                     | 1.12 (0.94-1.33)       | 0.85 (0.68-1.05)      |
|                                  |                             | Non-ischemic | 336/3754        | 9.0 (8.1-9.9)                       | Ref.                   | Ref.                  |

CI=confidence interval, HR=hazard ratio.

\*Covariates for adjustment: age, sex, systolic blood pressure, eGFR<sub>MDRD</sub>, LV ejection fraction and hemoglobin values.

SUPPLEMENTARY DATA

**Supplementary Table 5. Association between diabetes treatment at the study entry and risk of 1-year clinical outcomes in the subgroup of patients with CHF and diabetes.**

| Group                  | Outcome(s)           | Diabetes treatment | Events/patients | Rate per 100 patient-years (95% CI) | Unadjusted HR (95% CI) | Adjusted HR* (95% CI) |
|------------------------|----------------------|--------------------|-----------------|-------------------------------------|------------------------|-----------------------|
| Patients with diabetes | All-causes death     | Insulin            | 111/1078        | 10.3 (8.5-12.3)                     | 0.93 (0.68-1.27)       | 0.93 (0.64-1.33)      |
|                        |                      | Oral agents        | 106/1339        | 7.9 (6.5-9.5)                       | 0.69 (0.50-0.94)       | 0.73 (0.50-1.05)      |
|                        |                      | Diet               | 62/556          | 11.2 (8.7-14.1)                     | Ref.                   | Ref.                  |
|                        | Cardiovascular death | Insulin            | 57/1078         | 5.3 (4.0-6.8)                       | 0.82 (0.54-1.25)       | 0.84 (0.51-1.37)      |
|                        |                      | Oral agents        | 48/1339         | 3.6 (2.7-4.7)                       | 0.54 (0.35-0.82)       | 0.63 (0.38-1.06)      |
|                        |                      | Diet               | 36/556          | 6.5 (4.6-8.9)                       | Ref.                   | Ref.                  |
|                        | HF hospitalization   | Insulin            | 185/1078        | 17.2 (15.0-19.5)                    | 1.49 (1.12-1.98)       | 1.24 (0.89-1.71)      |
|                        |                      | Oral agents        | 172/1339        | 12.8 (11.1-14.8)                    | 1.05 (0.79-1.41)       | 1.04 (0.75-1.45)      |
|                        |                      | Diet               | 67/556          | 12.1 (9.5-15.0)                     | Ref.                   | Ref.                  |

CI=confidence interval, HR=hazard ratio.

\*Covariates for adjustment: age, sex, systolic blood pressure, eGFR<sub>MDRD</sub>, HF etiology, LV ejection fraction and hemoglobin values.

**Supplementary Appendix. Investigators from the participating centres**

**AUSTRIA Braunau:** J. Auer; **Graz:** K. Ablasser, F. Fruhwald, T. Dolze, K. Brandner; **Innsbruck:** S. Gstrein, G. Poelzl; **Sankt Poelten:** D. Moertl; **Vienna:** S. Reiter, A. Podczeck-Schweighofer; **BOSNIA HERZEGOVINA Mostar:** A. Muslibegovic, M. Vasilj, E. Fazlibegovic, M. Cesko, D. Zelenika, B. Palic, D. Pravdic, D. Cuk; **BULGARIA Sofia:** K. Vitlianova, T. Katova, T. Velikov, T. Kurteva, P. Gatzov, **Vidin:** D. Kamenova; **Varna:** M. Antova, V. Sirakova; **CZECH REPUBLIC Brno:** J. Krejci, M. Mikolaskova, J. Spinar; **Prague:** J. Krupicka, F. Malek, M. Hegarova; **Olomouc:** M. Lazarova; **Znojmo:** Z. Monhart; **EGYPT Alexandria:** M. Hassanein, M. Sobhy, F. El Messiry, A.H. El Shazly, Y. Elrakshy; **Assiut:** A. Youssef; **Benha:** A.A. Moneim; **Cairo:** M. Noamany, A. Reda, T.K. Abdel Dayem, N. Farag, S. Ibrahim Halawa, M. Abdel Hamid, K. Said, A. Saleh; **Damanhour, El Beheira:** H. Ebeid; **Giza Cairo:** R. Hanna, R. Aziz, O. Louis, M.A. Enen, B.S. Ibrahim; **Ismailya:** G. Nasr; **Port Said:** A. Elbahry; **Tanta:** H. Sobhy, M. Ashmawy; **Zagazig:** M. Gouda, W. Aboleineen; **FRANCE Besançon:** Y. Bernard, P. Luporsi, N. Meneveau, M. Pillot, M. Morel, M-F. Seronde, F. Schiele, F. Briand; **Bron – Lyon:** F. Delahaye; **Créteil:** T. Damy; **Dijon:** J-C. Eicher; **Lille:** P. de Groote, M. Fertin, N. Lamblin; **Paris:** R. Isnard, C. Lefol, S. Thevenin, A. Hagege, G. Jondeau, D. Logeart; **Poitiers:** V. Le Marcis, J-F. Ly, D. Coisne, B. Lequeux; **Rennes:** V. Le Moal, S. Mascle, P. Lotton, N. Behar, E. Donal, C. Thebault, C. Ridard, A. Reynaud, A. Basquin; **Rouen:** F. Bauer; **Senlis:** R. Codjia; **Toulouse:** M. Galinier; **GREECE Athens:** P. Tourikis, M. Stavroula, D. Tousoulis, C. Stefanadis, C. Chrysohoou, I. Kotrogiannis, V. Matzaraki, T. Dimitroula, A. Karavidas, G. Tsitsinakis, C. Kapelios, J. Nanas, H. Kampouri, E. Nana, E. Kaldara, A. Eugenidou; **Heraklion, Crete:** P. Vardas, I. Saloustros, A. Patrianakos; **Volos:** T. Tsaknakis, S. Evangelou, N. Nikoloulis, H. Tziourganou, A. Tsaroucha, A. Papadopoulou, A. Douras; **HUNGARY Budapest:** L. Polgar, B. Merkely, A. Kosztin, N. Nyolczas, A. Csaba Nagy; **Pecs (Baranya):** R. Halmosi; **ISRAEL Hadera:** J. Elber, I. Alony, A. Shotan, A. Vazan Fuhrmann; **Haifa:** O. Amir; **ITALY Atri:** S. Romano, S. Marcon, M. Penco, M. Di Mauro, E. Lemme; **Brescia:** V. Carubelli, R. Rovetta, M. Metra, M. Bulgari, F. Quinzani, C. Lombardi; **Cotignola:** S. Bosi, G. Schiavina, A. Squeri, A. Barbieri; **Cremona:** G. Di Tano, S. Pirelli; **Ferrara:** R. Ferrari, A. Fucili; **Foggia:** T. Passero, S. Musio, M. Di Biase, M. Correale, G. Salvemini; **Lumezzane:** S. Brognoli, E. Zanelli, A. Giordano; **Milano:** P. Agostoni, G. Italiano, E. Salvioni; **Modena:** S. Copelli, M.G. Modena, L. Reggianini, C. Valenti, A. Olaru; **Monserato:** S. Bandino, M. Deidda, G. Mercurio, C. Cadeddu Dessalvi; **Novara:** P.N. Marino, M.V. Di Ruocco, C. Sartori, C. Piccinino; **Palermo:** G. Parrinello, G. Licata, D. Torres, S. Giambanco, S. Busalacchi, S. Arrotti, S. Novo, R.M. Inciardi, P. Pieri, P.R. Chirco, M. Ausilia Galifi, G. Teresi, D. Buccheri, A. Minacapelli; **Passirana di rho (Milano):** M. Veniani, A. Frisinghelli; **Pavia:** S.G. Priori, S. Cattaneo, C. Opasich, A. Gualco; **Roma:** M. Pagliaro, M. Mancone, F. Fedele, A. Cinque, M. Vellini, I. Scarfo, F. Romeo, F. Ferraiuolo, D. Sergi; **San Bonifacio (Verona):** M. Anselmi; **Sassuolo:** F. Melandri, E. Leci, E. Iori; **Torino:** V. Bovolo, S. Pidello, S. Frea, S. Bergerone, M. Botta, F.G. Canavosio, F. Gaita; **Trieste:** M. Merlo, M. Cinquetti, G. Sinagra, F. Ramani, E. Fabris, D. Stolfo; **Udine:** J. Artico, D. Miani, C. Fresco, C. Daneluzzi, A. Proclemer; **Verona:** M. Cicoira, L. Zanolla, G. Marchese, F. Torelli, C. Vassanelli; **LATVIA Jelgava:** N. Voronina; **Riga:** A. Erglis; **LITHUANIA Kaunas:** V. Tamakauskas, V. Smalinskas, R. Karaliute, I. Petraskiene, E. Kazakauskaite, E. Rumbinaite, A. Kavoliuniene; **Marijampole:** V. Vysniauskas, R. Brazyte-Ramanauskienė, D. Petraskienė; **POLAND Biala:** S. Stankala, P. Switala, Z. Juszczak; **Bydgoszcz:** W. Sinkiewicz, W. Gilewski, J. Pietrzak; **Chelmza:** T. Orzel, P. Kasztelowicz; **Czestochowa:** P. Kardaszewicz, M. Lazorko-Piega, J. Gabryel; **Gdansk:** K. Mosakowska, J. Bellwon, A. Rynkiewicz, G. Raczak, E. Lewicka, A. Dabrowska-Kugacka; **Kielce:** R. Bartkowiak, B. Sosnowska-Pasiarska, B. Wozakowska-

## SUPPLEMENTARY DATA

Kaplon; **Kluczbork:** A. Krzeminski; **Krakow:** M. Zabojszcz, E. Mirek-Bryniarska, A. Grzegorzko, K. Bury, J. Nessler, J. Zalewski, A. Furman; **Lodz:** M. Broncel, A. Poliwczak, A. Bala, P. Zycinski, M. Rudzinska, L. Jankowski, J.D. Kasprzak, L. Michalak, K. Wojtczak Soska, J. Drozd, I. Huziuk, A. Retwinski; **Lublin:** P. Flis, J. Weglarz, A. Bodys; **Poznan:** S. Grajek, M. Kaluzna-Oleksy, E. Straburzynska-Migaj, R. Dankowski, K. Szymanowska, J. Grabia, A. Szyszka, A. Nowicka; **Pruszkow:** M. Samcik, L. Wolniewicz, K. Baczynska, K. Komorowska, I. Poprawa, E. Komorowska, D. Sajnaga, A. Zolbach, A. Dudzik-Plocica, A-F. Abdulkarim, A. Lauko-Rachocka; **Przeworsk:** L. Kaminski, A. Kostka, A. Cichy; **Sieradz:** P. Ruszkowski, M. Splawski; **Starachowice:** G. Fitas, A. Szymczyk, A. Serwicka, A. Fiega; **Strzegom:** D. Zysko; **Szczecin:** W. Krysiak, S. Szabowski, E. Skorek; **Warszawa:** P. Pruszczyk, P. Bienias, M. Ciurzynski, M. Welnicki, A. Mamcarz, A. Folga, T. Zielinski, T. Rywik, P. Leszek, M. Sobieszczanska-Malek, M. Piotrowska, K. Kozar-Kaminska, K. Komuda, J. Wisniewska, A. Tarnowska, P. Balsam, M. Marchel, G. Opolski, A. Kaplon-Cieslicka, R.J. Gil, O. Mozenska, K. Byczkowska, K. Gil, A. Pawlak, A. Michalek, P. Krzesinski, K. Piotrowicz, B. Uzieblo-Zyczkowska, A. Stanczyk, A. Skrobowski; **Wroclaw:** P. Ponikowski, E. Jankowska; **Zabrze:** P. Rozentryt, L. Polonski, E. Gadula-Gacek, E. Nowalany-Kozielska, A. Kuczaj, Z. Kalarus, M. Szulik, K. Przybylska, J. Klys; **Zamosc:** G. Prokop-Lewicka, A. Kleinrok; **PORTUGAL Carnaxide:** C. Tavares Aguiar, A. Ventosa; **Faro:** S. Pereira, R. Faria, J. Chin, I. De Jesus; **Guilhufe-Penafiel:** R. Santos, P. Silva, N. Moreno, C. Queirós, C. Lourenço, A. Pereira, A. Castro, A. Andrade; **Lisboa:** T. Oliveira Guimaraes, S. Martins, R. Placido, G. Lima, D. Brito, A.R. Francisco, R. Cardiga, M. Proenca, I. Araujo, F. Marques, C. Fonseca; **Porto:** B. Moura, S. Leite, M. Campelo, J. Silva-Cardoso, J. Rodrigues, I. Rangel, E. Martins, A. Sofia Correia; **Santarem:** M. Peres, L. Marta, G. Ferreira da Silva, D. Severino, D. Durao; **Vila Real:** S. Leao, P. Magalhaes, I. Moreira, A. Filipa Cordeiro, C. Ferreira, C. Araujo, A. Ferreira, A. Baptista; **ROMANIA Brasov:** M. Radoi; **Bucharest:** G. Bicescu, D. Vinereanu, C-J. Sinescu, C. Macarie, R. Popescu, I. Daha, G-A. Dan, C. Stanescu, A. Dan; **Constanta:** E. Craiu; **Galati:** E. Nechita; **Iasi:** V. Aursulesei; **Timisoara:** R. Christodorescu; **SERBIA Belgrade:** P. Otasevic, P.M. Seferovic, D. Simeunovic, A.D. Ristic, V. Celic, M. Pavlovic-Kleut, J. Suzic Lazic, B. Stojcevski, B. Pencic, A. Stevanovic, A. Andric; **Kragujevac:** V. Iric-Cupic, M. Jovic, G. Davidovic, S. Milanov; **Nis:** V. Mitic, V. Atanaskovic, S. Antic, M. Pavlovic, D. Stanojevic; **Niska Banja:** V. Stoickov, S. Ilic, M. Deljanin Ilic, D. Petrovic; **Sremska Kamenica (Vojvodina):** S. Stojisic, S. Kecojevic, S. Dodic, N. Cemerlic Adic, M. Cankovic, J. Stojiljkovic, B. Mihajlovic, A. Radin; **Zemun, Belgrade:** S. Radovanovic, M. Krotin; **SLOVAKIA Banovce nad Bebravou:** A. Klabnik; **Bratislava:** E. Goncalvesova, M. Pernicky, J. Murin; **Martin:** F. Kovar; **Presov:** J. Kmec, H. Semjanova; **SLOVENIA Brezice:** M. Strasek, M. Savnik Iskra; **Izola:** T. Ravnikar, N. Cernic Suligoj, J. Komel; **Ljubljana:** Z. Fras, B. Jug; **Maribor:** T. Glavic, R. Losic, M. Bombek, I. Krajnc, B. Krunic; **Murska Sobota:** S. Horvat, D. Kovac, D. Rajtman; **Ptuj:** V. Cencic, M. Letonja; **Sempeter pri Novi Gorici:** R. Winkler, M. Valentincic, C. Melihen-Bartolic, A. Bartolic; **Slovenj Gradec:** M. Pusnik Vrckovnik, M. Kladnik, C. Slemenik Pusnik, A. Marolt; **Trbovlje:** J. Klen, B. Drnovsek, B. Leskovar; **SPAIN Albacete:** M.J. Fernandez Anguita, J.C. Gallego Page, F.M. Salmeron Martinez; **Barakaldo (Vizcaya):** J. Andres; **Barcelona:** A.B. Genis, S. Mirabet, A. Mendez, L. Garcia-Cosio, E. Roig, V. Leon, J. Gonzalez-Costello, G. Muntane, A. Garay; **Granada:** V. Alcade-Martinez, S. Lopez Fernandez, R. Rivera-Lopez, M. Puga-Martinez, M. Fernandez-Alvarez, J.L. Serrano-Martinez; **La Coruna:** M. Crespo-Leiro, Z. Grille-Cancela, R. Marzoa-Rivas, P. Blanco-Canosa, M.J. Paniagua-Martin, E. Barge-Caballero; **La Laguna - Santa Cruz de Tenerife (Canary Islands):** I. Laynez Cerdana, I. Famara Hernandez Baldomero, A. Lara Padron; **Madrid:** S. Ofelia Rosillo, R. Dalmau Gonzalez-Gallarza, O. Salvador Montanes, A.M. Iniesta Manjavacas, A. Castro Conde, A. Araujo, T. Soria, P.

## SUPPLEMENTARY DATA

Garcia-Pavia, M. Gomez-Bueno, M. Cobo-Marcos, L. Alonso-Pulpon, J. Segovia Cubero, I. Sayago, A. Gonzalez-Segovia, A. Briceno, P. Escribano Subias, M. Vicente Hernandez, M.J. Ruiz Cano, M.A. Gomez Sanchez, J.F. Delgado Jimenez, E. Barrios Garrido-Lestache; **Malaga:** J.M. Garcia Pinilla; **Manacor (Mallorca):** B. Garcia de la Villa, A. Sahuquillo; **Marbella (Malaga):** R. Bravo Marques, F. Torres Calvo; **Murcia:** M.T. Perez-Martinez, M.R. Gracia-Rodenas, I. P. Garrido-Bravo, F. Pastor-Perez, D.A. Pascual-Figal; **Oviedo:** B. Diaz Molina; **Sabadell (Barcelona):** J. Orus, F. Epelde Gonzalo; **San Juan de Alicante:** V. Bertomeu, R. Valero, R. Martinez-Abellan, J. Quiles, J.A. Rodriguez-Ortega, I. Mateo, A. ElAmrani; **Sevilla:** C. Fernandez-Vivancos; **Tortosa:** D. Bierge Valero; **Valencia:** L. Almenar-Bonet, I.J. Sanchez-Lazaro, E. Marques-Sule, L. Facila-Rubio, J. Perez-Silvestre, P. Garcia-Gonzalez, F. Ridocci-Soriano, D. Garcia-Escriva, A. Pellicer-Cabo; **Valladolid:** L. de la Fuente Galan, J. Lopez Diaz, A. Recio Platero; **Vigo:** J.C. Arias; **Zaragoza:** T. Blasco-Peiro, M. Sanz Julve, E. Sanchez-Insa, C. Aured-Guallar, A. Portoles-Ocampo; *SWEDEN* **Stockholm:** M. Melin, E. Hägglund; **Lindesberg:** A. Stenberg, I-M. Lindahl; **Varberg:** B. Asserlund, L. Olsson; **Linköping:** U. Dahlström, M. Afzelius; **Jönköping:** P. Karlström, L. Tengvall; **Kristianstad:** P-A. Wiklund, B. Olsson; *TURKEY* **Ankara:** S. Kalayci, A. Temizhan; **Eskisehir:** Y. Cavusoglu; **Kilis:** E. Gencer; **Sivas:** M.B. Yilmaz, H. Gunes
